# Supplementary material for: Influence of the bridging ligand on the substitution behaviour of dinuclear Pt(ii) complexes. An experimental and theoretical approach
Source: Royal Society of Chemistry journal article supplement (doi:10.1039/b700770c), 2007-01-01
Supplement: b700770c.pdf [file b700770c.pdf]

**Supporting Information**

**Influence of the bridging ligand on the substitution behaviour of dinuclear Pt(II) complexes. An experimental and theoretical approach**

Hakan Ertürk, Andreas Hofmann, Ralph Puchta and Rudi van Eldik\*

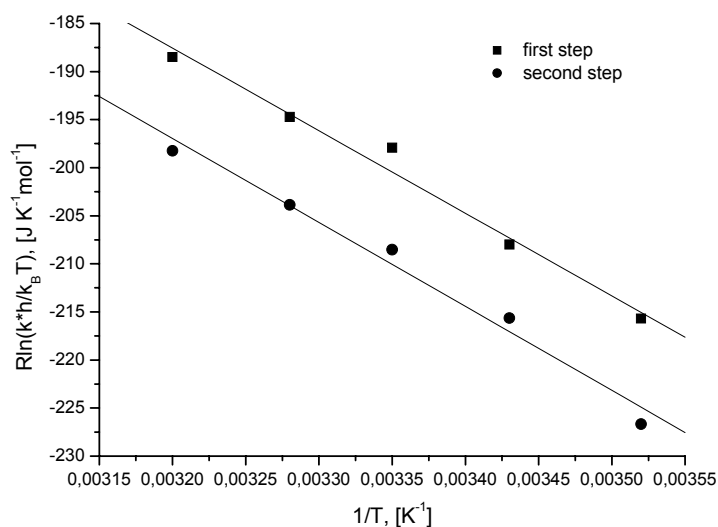

**Figure S1a.** Eyring plots for the determination of the activation parameters for the reaction of the **pentane** bridged diaqua complex with chloride.  $I = 0.01 \text{ M}$  ( $\text{HSO}_3\text{CF}_3$ ),  $\text{pH} = 2.0$ .

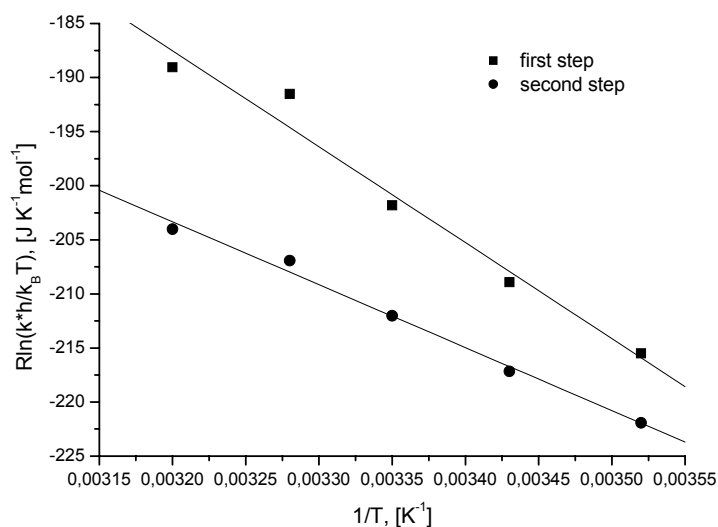

**Figure S1b.** Eyring plots for the determination of the activation parameters for the reaction of the **hexane** bridged diaqua complex with chloride.  $I = 0.01 \text{ M}$  ( $\text{HSO}_3\text{CF}_3$ ),  $\text{pH} = 2.0$ .

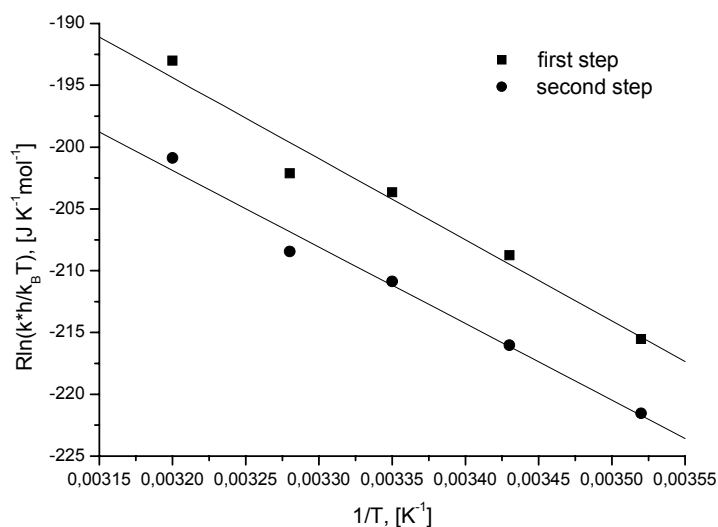

**Figure S1c.** Eyring plots for the determination of the activation parameters for the reaction of the **heptane** bridged diaqua complex with chloride.  $I = 0.01 \text{ M}$  ( $\text{HSO}_3\text{CF}_3$ ),  $\text{pH} = 2.0$ .

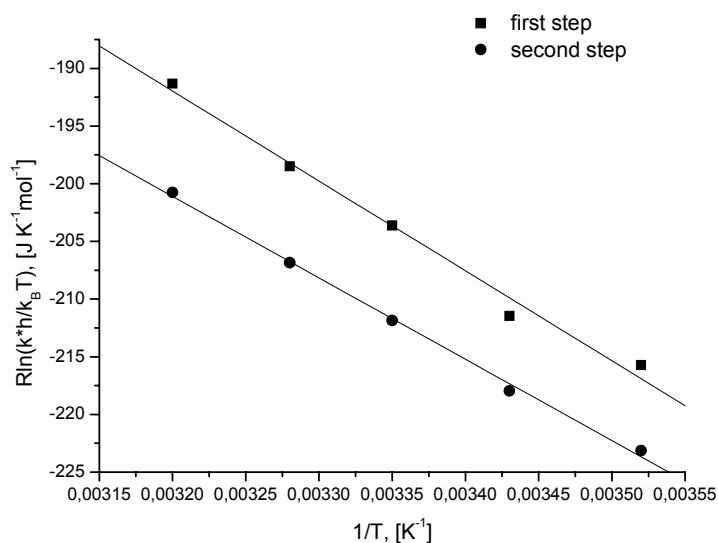

**Figure S1d.** Eyring plots for the determination of the activation parameters for the reaction of the **decane** bridged diaqua complex with chloride.  $I = 0.01 \text{ M}$  ( $\text{HSO}_3\text{CF}_3$ ),  $\text{pH} = 2.0$ .

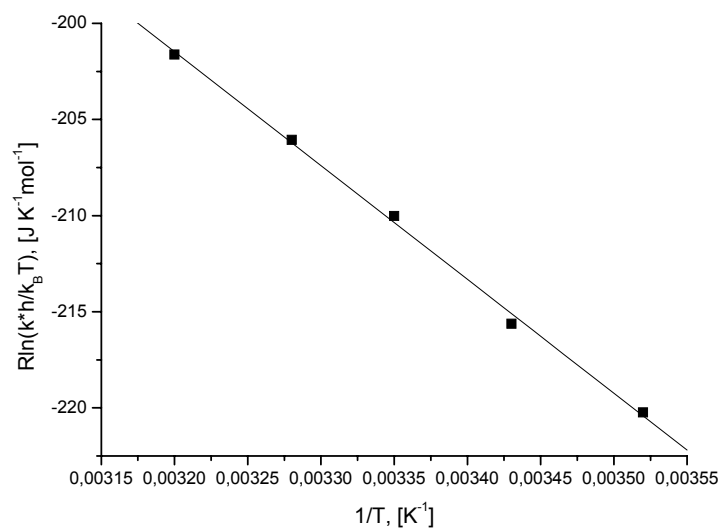

**Figure S1e.** Eyring plot for the determination of the activation parameters for the reaction of the **decane** bridged thiourea-aqua complex with chloride.  $I = 0.01$  M ( $H_2SO_3CF_3$ ),  $pH = 2.0$ .
